# Supplementary material for: Calculations of current densities for neutral and doubly charged persubstituted benzenes using effective core potentials
Source: Royal Society of Chemistry journal article supplement (doi:10.1039/c7cp00194k), 2017-01-01
Supplement: c7cp00194k1.pdf [file c7cp00194k1.pdf]

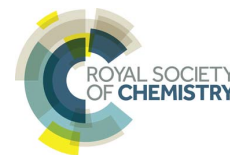

# Journal Name

ARTICLE TYPE

Cite this: DOI: 10.1039/xxxxxxxxxx

## Electronic Supplementary Information

### **Calculations of current densities for neutral and doubly charged persubstituted benzenes using effective core potentials**

Markus RAUHALAHTI,<sup>a</sup> Stefan TAUBERT,<sup>\*a</sup> Dage SUNDHOLM,<sup>a</sup> and Vincent LIÉGEOIS<sup>b</sup>

Received Date

Accepted Date

DOI: 10.1039/xxxxxxxxxx

[www.rsc.org/journalname](http://www.rsc.org/journalname)

## Implementation Details

Once the density matrix and the magnetically perturbed density matrices have been obtained from a NMR magnetic shielding calculation, the density matrices have to be transformed into the appropriate format for GIMIC calculations. The density matrices in the Gaussian code are expressed in real spherical-harmonic atomic orbital basis (spherical AO), whereas the GIMIC code use Cartesian basis sets (Cartesian AO). The basis functions are also sorted differently in the two codes. Thus, the elements of the density matrices have to be reordered and transformed from the spherical AO basis to the Cartesian representation. The expression for the transformation coefficients is derived in detail here.

### Spherical-harmonic atomic orbital

In most quantum chemistry packages, the AOs are written as a linear combination of contracted Gaussian Type Orbitals (CGTOs)<sup>1</sup>:

$$\chi_{\mu,\ell,m}^{\text{CGTO}}(\vec{r}) = \sum_{\nu} d_{\nu\mu} \chi_{\ell,m}^{\text{GTO}}(\alpha_{\nu}, \vec{r}) \quad (1)$$

A normalised primitive GTO is defined as<sup>1</sup>:

$$\chi_{\ell,m}^{\text{GTO}}(\alpha_{\nu}, r, \theta, \phi) = \sqrt{\frac{8 \cdot 2^{3\ell + \frac{3}{2}} \alpha_{\nu}^{\ell + \frac{3}{2}} (\ell + 1)!}{\pi^{\frac{1}{2}} (2\ell + 2)!}} r^{\ell} e^{-\alpha_{\nu} r^2} Y_{\ell m}(\theta, \phi) \quad (2)$$

$$= \frac{R_{\ell}^{\text{GTO}}(\alpha_{\nu}, r)}{r^{\ell}} \mathcal{Y}_{\ell m}(r, \theta, \phi) \quad (3)$$

where  $\mathcal{Y}_{\ell m}(r, \theta, \phi) = r^{\ell} Y_{\ell m}(\theta, \phi)$  is a complex solid harmonic. The contraction coefficients  $d_{\nu\mu}$  are the same for all the angular components are therefore the contraction only involve the radial part of the orbital. A CGTO can thus be separated into two parts:

$$\chi_{\mu,\ell,m}^{\text{CGTO}}(r, \theta, \phi) = \left[ \frac{\sum_{\nu} d_{\nu\mu} R_{\ell}^{\text{GTO}}(\alpha_{\nu}, r)}{r^{\ell}} \right] \mathcal{Y}_{\ell m}(r, \theta, \phi) \quad (4)$$

$$= \frac{R_{\ell}^{\text{CGTO}}(r)}{r^{\ell}} \mathcal{Y}_{\ell m}(r, \theta, \phi) \quad (5)$$

From the normalisation of the radial function, the contracted coefficients are related by:

$$1 = \int_0^{\infty} \left[ R_{\ell}^{\text{CGTO}}(r) \right]^2 r^2 dr$$
$$= \sum_{\nu, \eta} d_{\nu\mu} d_{\eta\mu} \frac{2^{\ell + \frac{3}{2}}}{(\alpha_{\nu} + \alpha_{\eta})^{\ell + \frac{3}{2}}} \sqrt{\alpha_{\nu}^{\ell + \frac{3}{2}} \alpha_{\eta}^{\ell + \frac{3}{2}}} \quad (6)$$

The complex solid harmonics are defined by introducing the real-valued solid harmonics ( $S_{\ell m}$ ):

$$\mathcal{Y}_{\ell 0} = \sqrt{\frac{2\ell + 1}{4\pi}} S_{\ell 0} \quad (7)$$

$$\mathcal{Y}_{\ell |m|} = (-1)^{|m|} \sqrt{\frac{2\ell + 1}{8\pi}} \left[ S_{\ell |m|} + i S_{\ell, -|m|} \right] \quad m \neq 0 \quad (8)$$

$$\mathcal{Y}_{\ell, -|m|} = \sqrt{\frac{2\ell + 1}{8\pi}} \left[ S_{\ell |m|} - i S_{\ell, -|m|} \right] \quad m \neq 0 \quad (9)$$

<sup>a</sup> Department of Chemistry, University of Helsinki, P.O.Box 55, FIN-00014 Helsinki, Finland.; E-mail: stefan.taubert@helsinki.fi

<sup>b</sup> Laboratoire de Chimie Théorique (LCT), Unité de Chimie-Physique Théorique et Structurale (UCPTS), University of Namur, Rue de Bruxelles, 61, B-5000 Namur, Belgium.

Since it is generally easier to deal with real atomic orbitals, we also use real normalised spherical-harmonic CGTOs which are defined as:

$$\chi_{\mu,\ell,|m|}^{CGTO,R}(r,\theta,\phi) = \frac{R_{\ell}^{CGTO}(r)}{r^{\ell}} (-1)^{|m|} \sqrt{\frac{2\ell+1}{4\pi}} S_{\ell,|m|} \quad (10)$$

$$\chi_{\mu,\ell,-|m|}^{CGTO,R}(r,\theta,\phi) = \frac{R_{\ell}^{CGTO}(r)}{r^{\ell}} (-1)^{|m|} \sqrt{\frac{2\ell+1}{4\pi}} S_{\ell,-|m|} \quad (11)$$

Note that the  $(-1)^{|m|}$  phase factor is often omitted and will not be considered in the following.

The real-valued solid harmonics ( $S_{\ell m}$ ) for  $\ell \leq 4$  are given in Table 1.

**Table 1** The real solid harmonics  $S_{\ell m}(\vec{r})$  for  $\ell \leq 4$

| $m / \ell$ | 0   | 1                                | 2                                                   | 3                                                       | 4                                               |
|------------|-----|----------------------------------|-----------------------------------------------------|---------------------------------------------------------|-------------------------------------------------|
| 4          |     |                                  |                                                     |                                                         | $\frac{1}{8}\sqrt{35}[x^4 - 6x^2y^2 + y^4]$     |
| 3          |     |                                  | $\frac{1}{2}\sqrt{\frac{5}{2}}[x^3 - 3xy^2]$        | $\frac{1}{2}\sqrt{\frac{35}{2}}[x^3z - 3xy^2z]$         | $\frac{1}{4}\sqrt{\frac{35}{2}}[x^3z - 3xy^2z]$ |
| 2          |     | $\frac{1}{2}\sqrt{3}[x^2 - y^2]$ | $\frac{1}{2}\sqrt{15}[x^2z - y^2z]$                 | $\frac{1}{4}\sqrt{5}[7z^2 - r^2][x^2 - y^2]$            |                                                 |
| 1          | $x$ | $\sqrt{3}xz$                     | $\frac{1}{2}\sqrt{\frac{3}{2}}[4xz^2 - x^3 - xy^2]$ | $\frac{1}{2}\sqrt{\frac{5}{2}}[4xz^3 - 3x^3z - 3xy^2z]$ |                                                 |
| 0          | $1$ | $z$                              | $\frac{1}{2}[2z^3 - x^2 - y^2]$                     | $\frac{1}{2}[2z^3 - 3x^2z - 3y^2z]$                     | $\frac{1}{8}[35z^4 - 30z^2r^2 + 3r^4]$          |
| -1         | $y$ | $\sqrt{3}yz$                     | $\frac{1}{2}\sqrt{\frac{3}{2}}[4yz^2 - x^2y - y^3]$ | $\frac{1}{2}\sqrt{\frac{5}{2}}[4yz^3 - 3x^2yz - 3y^3z]$ |                                                 |
| -2         |     | $\sqrt{3}xy$                     | $\sqrt{15}xyz$                                      | $\frac{1}{2}\sqrt{5}[6xyz^2 - x^3y - xy^3]$             |                                                 |
| -3         |     |                                  | $\frac{1}{2}\sqrt{\frac{3}{2}}[3x^2y - y^3]$        | $\frac{1}{2}\sqrt{\frac{35}{2}}[3x^2yz - y^3z]$         |                                                 |
| -4         |     |                                  |                                                     | $\frac{1}{8}\sqrt{35}[x^3y - xy^3]$                     |                                                 |

### Cartesian atomic orbital

Even though spherical AOs have many advantages as compared to Cartesian AOs, quantum chemistry codes often employ Cartesian AOs in the algorithms for computational reasons. Transformations between the two representations are an integrated part of many electronic structure codes. A Cartesian GTO is defined as:

$$\begin{aligned} \chi_{\ell_x,\ell_y,\ell_z}^{\text{Cart,GTO}}(\alpha_v, x, y, z) &= \frac{R_{\ell}^{\text{GTO}}(\alpha_v, r)}{r^{\ell}} \sqrt{\frac{\ell_x!\ell_y!\ell_z!(2\ell+2)!}{8\pi(2\ell_x)!(2\ell_y)!(2\ell_z)!(\ell+1)!}} x^{\ell_x} y^{\ell_y} z^{\ell_z} \\ &= \sqrt{\frac{2^{3\ell+\frac{3}{2}} \alpha_v^{\ell+\frac{3}{2}} \ell_x!\ell_y!\ell_z!}{\pi^{\frac{3}{2}}(2\ell_x)!(2\ell_y)!(2\ell_z)!}} x^{\ell_x} y^{\ell_y} z^{\ell_z} e^{-\alpha_v r^2} \quad \ell_x + \ell_y + \ell_z = \ell \end{aligned} \quad (12)$$

A normalised Cartesian CGTO is therefore defined as:

$$\chi_{p,\ell_x,\ell_y,\ell_z}^{\text{Cart,CGTO}}(x, y, z) = \frac{R_{\ell}^{\text{CGTO}}(r)}{r^{\ell}} \sqrt{\frac{\ell_x!\ell_y!\ell_z!(2\ell+2)!}{8\pi(2\ell_x)!(2\ell_y)!(2\ell_z)!(\ell+1)!}} x^{\ell_x} y^{\ell_y} z^{\ell_z} \quad (13)$$

GIMIC as well as many quantum chemistry codes do not use normalised CGTOs but instead they use the same normalisation factor for all the Cartesian orbitals of a given  $\ell$ :

$$\begin{aligned} \chi_{p,\ell_x,\ell_y,\ell_z}'^{\text{Cart,CGTO}}(x, y, z) &= \frac{R_{\ell}^{\text{CGTO}}(r)}{r^{\ell}} \sqrt{\frac{(2\ell+2)!}{8\pi 2^{\ell}(\ell+1)!}} x^{\ell_x} y^{\ell_y} z^{\ell_z} \\ &= \sqrt{\frac{(2\ell_x)!(2\ell_y)!(2\ell_z)!}{\ell_x!\ell_y!\ell_z! 2^{\ell}}} \chi_{p,\ell_x,\ell_y,\ell_z}^{\text{Cart,CGTO}}(x, y, z) \end{aligned} \quad (14)$$

## Relation from Cartesian to spherical-harmonic functions

A shell of normalised Cartesian CGTO of a given  $\ell$  value can be transformed into real normalised CGTOs:

$$\chi_{\mu,\ell,m}^{\text{CGTO,R}}(r,\theta,\phi) = \sum_{p \in \ell_x + \ell_y + \ell_z = \ell} c_{\ell,m,\ell_x,\ell_y,\ell_z} \chi_{p,\ell_x,\ell_y,\ell_z}^{\text{Cart,CGTO}}(x,y,z) \quad (15)$$

The coefficients for  $m > 0$ ,  $m < 0$  and  $m = 0$  are given by<sup>2</sup>:

$$\begin{aligned} c_{\ell,|m|,\ell_x,\ell_y,\ell_z} &= \sqrt{\frac{(2\ell_x)!(2\ell_y)!(2\ell_z)!\ell!(\ell-|m|)!}{(2\ell)!\ell_x!\ell_y!\ell_z!(\ell+|m|)!}} \frac{1}{2^\ell \ell!} \\ &\times \left[ \sum_{\alpha=0}^{(\ell-|m|)/2} \binom{\ell}{\alpha} \binom{\alpha}{\tau} \frac{(-1)^\alpha (2\ell-2\alpha)!}{(\ell-|m|-2\alpha)!} \right] \\ &\times \left[ \sum_{\beta=0}^{\tau} \binom{\tau}{\beta} \binom{|m|}{\ell_x-2\beta} \left\{ (-1)^{(|m|-\ell_x+2\beta)/2} + (-1)^{-(|m|-\ell_x+2\beta)/2} \right\} \frac{1}{\sqrt{2}} \right] \end{aligned} \quad (16)$$

$$\begin{aligned} c_{\ell,-|m|,\ell_x,\ell_y,\ell_z} &= \sqrt{\frac{(2\ell_x)!(2\ell_y)!(2\ell_z)!\ell!(\ell-|m|)!}{(2\ell)!\ell_x!\ell_y!\ell_z!(\ell+|m|)!}} \frac{1}{2^\ell \ell!} \\ &\times \left[ \sum_{\alpha=0}^{(\ell-|m|)/2} \binom{\ell}{\alpha} \binom{\alpha}{\tau} \frac{(-1)^\alpha (2\ell-2\alpha)!}{(\ell-|m|-2\alpha)!} \right] \\ &\times \left[ \sum_{\beta=0}^{\tau} \binom{\tau}{\beta} \binom{|m|}{\ell_x-2\beta} \left\{ (-1)^{(|m|-\ell_x+2\beta)/2} - (-1)^{-(|m|-\ell_x+2\beta)/2} \right\} \frac{1}{i\sqrt{2}} \right] \end{aligned} \quad (17)$$

$$\begin{aligned} c_{\ell,0,\ell_x,\ell_y,\ell_z} &= \sqrt{\frac{(2\ell_x)!(2\ell_y)!(2\ell_z)!\ell!}{(2\ell)!\ell_x!\ell_y!\ell_z!}} \frac{1}{2^\ell \ell!} \left[ \sum_{\alpha=0}^{\ell/2} \binom{\ell}{\alpha} \binom{\alpha}{(\ell_x+\ell_y)/2} \frac{(-1)^\alpha (2\ell-2\alpha)!}{(\ell-2\alpha)!} \right] \\ &\times \frac{((\ell_x+\ell_y)/2)!}{(\ell_x/2)!(\ell_y/2)!} \end{aligned} \quad (18)$$

where  $\tau = (\ell_x + \ell_y - |m|)/2$  and is an integer. If  $\tau$  is a half-integer,  $c_{\ell,m,\ell_x,\ell_y,\ell_z} = 0$ .  $\alpha$  and  $\beta$  are also integers. Note that the binomial term  $\binom{a}{b}$  is zero for  $b < 0$  and for  $b > a$ .

## Relation from spherical-harmonic to Cartesian functions

The inverse relation, from real normalised CGTO to normalised Cartesian CGTO reads:

$$\chi_{p,\ell_x,\ell_y,\ell_z}^{\text{Cart,CGTO}}(x,y,z) = \sum_{\mu \in \ell_x + \ell_y + \ell_z, m} c_{\ell,m,\ell_x,\ell_y,\ell_z}^{-1} \chi_{\mu,\ell,m}^{\text{CGTO,R}}(r,\theta,\phi) \quad (19)$$

where the  $c_{\ell,m,\ell_x,\ell_y,\ell_z}^{-1}$  coefficients must fulfil the following relation:

$$\sum_{\ell_x + \ell_y + \ell_z = \ell} c_{\ell,m_1,\ell_x,\ell_y,\ell_z} c_{\ell,m_2,\ell_x,\ell_y,\ell_z}^{-1} = \delta_{m_1,m_2} \quad (20)$$

When  $S$  denotes the overlap matrix for Cartesian AOs,  $c^\dagger S c = 1$  is the overlap matrix for spherical-harmonic orbitals. Therefore,  $c^{-1} = c^\dagger S$ :

$$c_{\ell,m,\ell_{x1},\ell_{y1},\ell_{z1}}^{-1} = \sum_{\ell_{x2},\ell_{y2},\ell_{z2}=\ell} S_{\ell_{x1},\ell_{y1},\ell_{z1},\ell_{x2},\ell_{y2},\ell_{z2}} c_{\ell,m,\ell_{x1},\ell_{y1},\ell_{z1}} \quad (21)$$

The overlap between normalised Cartesian orbitals of the same total angular momentum is:

$$S_{\ell_{x1}, \ell_{y1}, \ell_{z1}, \ell_{x2}, \ell_{y2}, \ell_{z2}} = \left[ \frac{(\ell_{x1} + \ell_{x2})!(\ell_{y1} + \ell_{y2})!(\ell_{z1} + \ell_{z2})!}{((\ell_{x1} + \ell_{x2})/2)!((\ell_{y1} + \ell_{y2})/2)!((\ell_{z1} + \ell_{z2})/2)!} \right] \times \left[ \frac{\ell_{x1}!\ell_{y1}!\ell_{z1}!\ell_{x2}!\ell_{y2}!\ell_{z2}!}{(2\ell_{x1})!(2\ell_{y1})!(2\ell_{z1})!(2\ell_{x2})!(2\ell_{y2})!(2\ell_{z2})!} \right]^{1/2} \quad (22)$$

and  $(\ell_{x1} + \ell_{x2})/2, (\ell_{y1} + \ell_{y2})/2, (\ell_{z1} + \ell_{z2})/2$  are integers or  $S = 0$ .

### Transformation of the density matrix

Equations 15 and 19 can be generalised to express the relation between all the normalised real spherical-harmonic CGTOs and normalised Cartesian CGTOs for a molecule in a given basis set:

$$\chi_{\mu}^{\text{CGTO, R}}(r, \theta, \phi) = \sum_p c_{p, \mu} \chi_p^{\text{Cart, CGTO}}(x, y, z) \quad (23)$$

$$\chi_p^{\text{Cart, CGTO}}(x, y, z) = \sum_{\mu} c_{\mu, p}^{-1} \chi_{\mu}^{\text{CGTO, R}}(r, \theta, \phi) \quad (24)$$

where  $\mu, \nu$  are used to refer to spherical-harmonic CGTO and  $p, q$  to Cartesian CGTO.

By introducing the LCAO coefficients ( $C_{\mu i}^{\text{CGTO, R}}$ ) of the molecular orbitals ( $\phi_i(r, \theta, \phi)$ ) one obtains:

$$\phi_i(r, \theta, \phi) = \sum_{\mu} C_{\mu i}^{\text{CGTO, R}} \chi_{\mu}^{\text{CGTO, R}}(r, \theta, \phi) \quad (25)$$

$$= \sum_p C_{pi}^{\text{Cart, CGTO}} \chi_p^{\text{Cart, CGTO}}(x, y, z) \quad (26)$$

Inserting Equations 23 and 24 into the two previous equations gives the two sets of LCAO coefficients:

$$C_{pi}^{\text{Cart, CGTO}} = \sum_{\mu} c_{p, \mu} C_{\mu i}^{\text{CGTO, R}} \quad (27)$$

$$C_{\mu i}^{\text{CGTO, R}} = \sum_p c_{\mu, p}^{-1} C_{pi}^{\text{Cart, CGTO}} \quad (28)$$

Finally, the definition of the density matrices expressed in both type of orbitals are given by:

$$D_{\mu\nu}^{\text{CGTO, R}} = \sum_i^{\text{occ}} C_{\mu i}^{\text{CGTO, R}} C_{\nu i}^{*\text{CGTO, R}} = \sum_i^{\text{occ}} \sum_{p, q} c_{\mu, p}^{-1} c_{\nu, q}^{-1*} C_{pi}^{\text{Cart, CGTO}} C_{qi}^{*\text{Cart, CGTO}} \quad (29)$$

$$D_{pq}^{\text{Cart, CGTO}} = \sum_i^{\text{occ}} C_{pi}^{\text{Cart, CGTO}} C_{qi}^{*\text{Cart, CGTO}} = \sum_i^{\text{occ}} \sum_{\mu, \nu} c_{p, \mu} c_{q, \nu}^* C_{\mu i}^{\text{CGTO, R}} C_{\nu i}^{*\text{CGTO, R}} \quad (30)$$

The relation between the two density matrices are therefore:

$$D_{pq}^{\text{Cart, CGTO}} = \sum_{\mu, \nu} c_{p, \mu} c_{q, \nu}^* D_{\mu \nu}^{\text{CGTO, R}} \quad (31)$$

$$D_{\mu \nu}^{\text{CGTO, R}} = \sum_{p, q} c_{\mu, p}^{-1} c_{\nu, q}^{-1*} D_{pq}^{\text{Cart, CGTO}} \quad (32)$$

where Eq. 31 is the key expression used in Gaussian2Gimic.py to transform the density matrices obtained using the Gaussian quantum chemistry program to the input density matrices of the GIMIC code.

## Cartesian coordinates of the studied molecules

```

12
c6f6 neutral, -827.6361893627 H
C 1.2029717618 -0.6945316150 0.0000000055
C 1.2029717630 0.6945316155 -0.0000000070
C -0.0000000000 1.3890593511 0.0000000016
C -1.2029717622 0.6945316135 0.0000000055
C -1.2029717612 -0.6945316147 -0.0000000068
C -0.0000000013 -1.3890593501 0.0000000014
F 2.3564569812 -1.3604981255 0.0000000251
F 2.3564569822 1.3604981243 -0.0000000317
F -0.0000000008 2.7209876484 0.0000000072
F -2.3564569817 1.3604981215 0.0000000239
F -2.3564569788 -1.3604981233 -0.0000000307
F -0.0000000022 -2.7209876457 0.0000000061

```

```

12
c6f6 dicat singlet -826.7163769216 H
C 1.1761424411 -0.7677708407 0.0000043347
C 1.1761761890 0.7678160455 0.0000160067
C 0.0000229032 1.5126990405 -0.0001064723
C -1.1761469109 0.7677653935 -0.0000074900
C -1.1761806469 -0.7678105957 0.0000278328
C -0.0000328802 -1.5126990384 -0.0000736096
F 2.3155372696 -1.3022554995 0.0000659485
F 2.3156101554 1.3022396191 0.0001988979
F -0.0000507626 2.8019457859 -0.0001877252
F -2.3155216583 1.3022404101 0.0000759214
F -2.3155945086 -1.3022245346 0.0001889341
F 0.0000384092 -2.8019457857 -0.0002025790

```

```

12
c6cl6 neutral, -2989.5278990300 H
C 1.2115217 -0.6994724 0.0000000
C 1.2115217 0.6994724 0.0000000
C -0.0000000 1.3989447 0.0000000
C -1.2115217 0.6994724 0.0000000
C -1.2115217 -0.6994724 0.0000000
C -0.0000000 -1.3989447 0.0000000
Cl 2.7043248 -1.5613426 0.0000000
Cl 2.7043248 1.5613426 0.0000000
Cl 0.0000000 3.1226853 0.0000000
Cl -2.7043248 1.5613426 0.0000000
Cl -2.7043248 -1.5613426 0.0000000
Cl 0.0000000 -3.1226853 0.0000000

```

12  
c6cl6 dication singlet, -2988.7108023150 H  
C 1.2007293 -0.7549028 -0.0000684  
C 1.2006788 0.7549155 0.0000097  
C -0.0000282 1.4780155 -0.0000228  
C -1.2007309 0.7549023 -0.0000244  
C -1.2006804 -0.7549150 0.0000700  
C 0.0000259 -1.4780155 0.0000302  
Cl 2.6530691 -1.5404387 -0.0002655  
Cl 2.6530162 1.5405077 0.0002602  
Cl -0.0000514 3.1724733 0.0000450  
Cl -2.6530668 1.5404385 -0.0002790  
Cl -2.6530142 -1.5405075 0.0002259  
Cl 0.0000528 -3.1724733 0.0000191

12  
c6br6 neutral, -15672.7976747800 H  
C 1.2126367 -0.7001161 0.0000000  
C 1.2126367 0.7001161 0.0000000  
C -0.0000000 1.4002323 0.0000000  
C -1.2126367 0.7001161 0.0000000  
C -1.2126367 -0.7001161 0.0000000  
C -0.0000000 -1.4002323 0.0000000  
Br 2.8543839 -1.6479793 0.0000000  
Br 2.8543839 1.6479793 0.0000000  
Br 0.0000000 3.2959587 0.0000000  
Br -2.8543839 1.6479793 0.0000000  
Br -2.8543839 -1.6479793 0.0000000  
Br 0.0000000 -3.2959587 0.0000000

12  
c6br6 dicat, -15671.9903025700 H  
C 1.1990584 -0.6922780 0.0000000  
C 1.1990584 0.6922780 0.0000000  
C -0.0000000 1.3845592 -0.0000000  
C -1.1990584 0.6922780 0.0000000  
C -1.1990584 -0.6922780 0.0000000  
C 0.0000000 -1.3845592 -0.0000000  
Br 2.8275389 -1.6324902 0.0000000  
Br 2.8275389 1.6324902 0.0000000  
Br 0.0000000 3.2649721 -0.0000000  
Br -2.8275389 1.6324902 0.0000000  
Br -2.8275389 -1.6324902 0.0000000  
Br -0.0000000 -3.2649721 -0.0000000

12  
c6i6 neutral, -2015.1509068 H  
C 0.0000000000 1.4051159234 -0.0000000000  
C 1.2168660862 0.7025579617 -0.0000000000  
C 1.2168660862 -0.7025579617 -0.0000000000  
C -0.0000000000 -1.4051159234 -0.0000000000  
C -1.2168660862 -0.7025579617 -0.0000000000  
C -1.2168660862 0.7025579617 -0.0000000000  
I 0.0000000000 3.5243498760 -0.0000000000  
I 3.0521765267 1.7621749380 0.0000000000

|   |               |               |               |
|---|---------------|---------------|---------------|
| I | 3.0521765267  | -1.7621749380 | 0.0000000000  |
| I | 0.0000000000  | -3.5243498760 | 0.0000000000  |
| I | -3.0521765267 | -1.7621749380 | -0.0000000000 |
| I | -3.0521765267 | 1.7621749380  | 0.0000000000  |

12

c6i6 dication, -2014.456054

|   |               |               |               |
|---|---------------|---------------|---------------|
| C | -1.2034403673 | 0.6953567431  | 0.0000185867  |
| C | -1.2039147376 | -0.6945335814 | 0.0000020867  |
| C | -0.0004797656 | -1.3899290232 | -0.0000194133 |
| C | 1.2034402032  | -0.6953631461 | 0.0000162867  |
| C | 1.2039187753  | 0.6945356716  | 0.0000044867  |
| C | 0.0004732012  | 1.3899308224  | -0.0000222133 |
| I | -3.0087799230 | 1.7384545731  | 0.0000681867  |
| I | -3.0099602423 | -1.7363975871 | 0.0000502867  |
| I | -0.0012180997 | -3.4748505515 | -0.0001344133 |
| I | 3.0087960417  | -1.7385076866 | 0.0001013867  |
| I | 3.0099980890  | 1.7364381697  | 0.0000169867  |
| I | 0.0011644392  | 3.4748633628  | -0.0001024133 |

12

c6at6 neutral, -1803.3981133270 H

|    |            |            |           |
|----|------------|------------|-----------|
| C  | 1.2157385  | -0.7019070 | 0.0000000 |
| C  | 1.2157385  | 0.7019070  | 0.0000000 |
| C  | 0.0000000  | 1.4038139  | 0.0000000 |
| C  | -1.2157385 | 0.7019070  | 0.0000000 |
| C  | -1.2157385 | -0.7019070 | 0.0000000 |
| C  | 0.0000000  | -1.4038139 | 0.0000000 |
| At | 3.1528191  | -1.8202809 | 0.0000000 |
| At | 3.1528191  | 1.8202809  | 0.0000000 |
| At | 0.0000000  | 3.6405619  | 0.0000000 |
| At | -3.1528191 | 1.8202809  | 0.0000000 |
| At | -3.1528191 | -1.8202809 | 0.0000000 |
| At | 0.0000000  | -3.6405619 | 0.0000000 |

12

c6at6 dicat, -1802.7653484400 H

|    |               |               |               |
|----|---------------|---------------|---------------|
| C  | 1.2034841144  | -0.6949736187 | 0.0000137989  |
| C  | 1.2036050896  | 0.6947648848  | -0.0000150011 |
| C  | 0.0001207973  | 1.3897687301  | 0.0000119989  |
| C  | -1.2034842784 | 0.6949740791  | -0.0000102011 |
| C  | -1.2036048620 | -0.6947644244 | 0.0000089989  |
| C  | -0.0001207661 | -1.3897679681 | -0.0000095011 |
| At | 3.1028867464  | -1.7916972763 | 0.0001110989  |
| At | 3.1031992255  | 1.7911572774  | -0.0001187011 |
| At | 0.0003114112  | 3.5830565882  | 0.0001046989  |
| At | -3.1028878153 | 1.7916966360  | -0.0000887011 |
| At | -3.1031981936 | -1.7911579177 | 0.0000810989  |
| At | -0.0003113800 | -3.5830554240 | -0.0000895011 |

18

c6seh6 neutral, -14640.8345301100 H

|   |               |               |               |
|---|---------------|---------------|---------------|
| C | -0.8457607527 | -1.1312653893 | -0.0349906124 |
| C | 0.5487257438  | -1.2689082057 | -0.0260108554 |
| C | 1.4035973964  | -0.1585903696 | -0.0304614456 |
| C | 0.8457165092  | 1.1312370911  | 0.0349974998  |



|    |               |               |               |
|----|---------------|---------------|---------------|
| C  | -0.5487808245 | 1.2688763795  | 0.0260524067  |
| C  | -1.4036403682 | 0.1585676562  | 0.0304032837  |
| SE | -3.3004753194 | 0.5099409523  | 0.2017428406  |
| H  | -3.5839701211 | -0.7972298142 | 0.8261436214  |
| SE | -1.8880551219 | -2.7537345432 | -0.2124153134 |
| H  | -3.0353544067 | -2.0628694987 | -0.8332668494 |
| SE | 1.3181928281  | -3.0498123064 | 0.1567971026  |
| H  | 1.4343936588  | -3.3154593707 | -1.2893114206 |
| SE | 3.3004310927  | -0.5098252807 | -0.2021326437 |
| H  | 3.5838556051  | 0.7975307777  | -0.8261697753 |
| SE | 1.8880339712  | 2.7536735809  | 0.2126018613  |
| H  | 3.0355306325  | 2.0626791685  | 0.8329343942  |
| SE | -1.3184269236 | 3.0497257585  | -0.1565294324 |
| H  | -1.4340135998 | 3.3154634136  | 1.2896153381  |

18

c6seh6 dicat singlet, -14640.1801356500 H

|    |               |               |               |
|----|---------------|---------------|---------------|
| C  | -0.8340183840 | -1.1328396615 | -0.0005336682 |
| C  | 0.5513841199  | -1.2760266397 | 0.0139140670  |
| C  | 1.3965942483  | -0.1689108475 | 0.0023263469  |
| C  | 0.8340307989  | 1.1328326221  | 0.0005705174  |
| C  | -0.5513734908 | 1.2760184517  | -0.0139628366 |
| C  | -1.3965830503 | 0.1689014974  | -0.0023205263 |
| SE | -3.2723433796 | 0.4873136569  | -0.0083072760 |
| H  | -3.5602410053 | -0.5169165399 | 1.0462075380  |
| SE | -1.8875181947 | -2.7172062014 | 0.0012876587  |
| H  | -2.8136963409 | -2.2376983221 | -1.0549408618 |
| SE | 1.3210534429  | -3.0574883149 | 0.0512198786  |
| H  | 1.3823862422  | -3.1893712760 | -1.4214939744 |
| SE | 3.2723479505  | -0.4873618294 | 0.0083378933  |
| H  | 3.5602853905  | 0.5169044614  | -1.0461328265 |
| SE | 1.8875118167  | 2.7172121750  | -0.0010674067 |
| H  | 2.8136400253  | 2.2376385912  | 1.0551765954  |
| SE | -1.3210237643 | 3.0574848280  | -0.0514895971 |
| H  | -1.3824364251 | 3.1895133486  | 1.4212084783  |

18

c6sec16 neutral, -17398.2573656300 H

|    |               |               |               |
|----|---------------|---------------|---------------|
| C  | -1.0415546272 | 0.9402645023  | 0.0170785660  |
| C  | -1.3350806170 | -0.4319243576 | -0.0167382813 |
| C  | -0.2934818534 | -1.3722841607 | 0.0159820457  |
| C  | 1.0416312881  | -0.9403491600 | -0.0171529748 |
| C  | 1.3351420934  | 0.4318401178  | 0.0168112910  |
| C  | 0.2935466895  | 1.3721860623  | -0.0160917150 |
| SE | 0.7106415836  | 3.2498051932  | -0.1720670463 |
| CL | -0.7007554851 | 3.7228676593  | -1.8363113281 |
| SE | -2.4591173259 | 2.2400299465  | 0.1750003066  |
| CL | -3.5717844142 | 1.2533570264  | 1.8405436554  |
| SE | -3.1696237833 | -1.0094884799 | -0.1739793509 |
| CL | -2.8735016809 | -2.4635297606 | -1.8423908541 |
| SE | -0.7106349477 | -3.2499013905 | 0.1712588944  |
| CL | 0.6998460100  | -3.7235734489 | 1.8360130256  |
| SE | 2.4590981291  | -2.2402068379 | -0.1745397374 |
| CL | 3.5730481256  | -1.2534667225 | -1.8391495994 |
| SE | 3.1696646290  | 1.0093327165  | 0.1744312362  |
| CL | 2.8729161863  | 2.4650410943  | 1.8413018666  |

18

secl6 dication singlet, -17397.5813589000

|    |               |               |               |
|----|---------------|---------------|---------------|
| C  | -1.2039435011 | 0.7026934483  | 0.0054446150  |
| C  | -1.2105244341 | -0.6912810869 | -0.0054664153 |
| C  | -0.0065855363 | -1.3939124911 | 0.0053784110  |
| C  | 1.2039325638  | -0.7026734520 | -0.0054168895 |
| C  | 1.2105137151  | 0.6912993852  | 0.0054684349  |
| C  | 0.0065761827  | 1.3939318396  | -0.0054076129 |
| SE | 0.0160878154  | 3.3299411673  | -0.0173934784 |
| CL | 0.0041906886  | 3.6454219567  | -2.1499678985 |
| SE | -2.8757664398 | 1.6789885658  | 0.0174386127  |
| CL | -3.1555151279 | 1.8259904516  | 2.1500270126  |
| SE | -2.8918166942 | -1.6512020085 | -0.0172919033 |
| CL | -3.1595980201 | -1.8195986939 | -2.1498308402 |
| SE | -0.0160915590 | -3.3299225864 | 0.0172271591  |
| CL | -0.0042166511 | -3.6455633505 | 2.1497779546  |
| SE | 2.8757564842  | -1.6789662140 | -0.0172835605 |
| CL | 3.1556452718  | -1.8260149793 | -2.1498490426 |
| SE | 2.8918065297  | 1.6512171649  | 0.0173028747  |
| CL | 3.1595487122  | 1.8196508833  | 2.1498425668  |

18

c6seme6 neutral, -14876.6147754300 H

|    |               |               |               |
|----|---------------|---------------|---------------|
| C  | -1.0067593188 | -0.9823883386 | 0.0150388363  |
| C  | 0.3473716117  | -1.3629979624 | -0.0166213953 |
| C  | 1.3540454936  | -0.3806805359 | 0.0164037906  |
| C  | 1.0067421325  | 0.9823773118  | -0.0150544585 |
| C  | -0.3473889252 | 1.3629868780  | 0.0166312021  |
| C  | -1.3540622430 | 0.3806710988  | -0.0163966959 |
| SE | -3.1997475466 | 0.8997202211  | -0.3661517069 |
| SE | -2.3790897388 | -2.3214146974 | 0.3644205213  |
| SE | 0.8209520406  | -3.2208220004 | -0.3665863589 |
| SE | 3.1997283044  | -0.8997053437 | 0.3662019838  |
| SE | 2.3790933921  | 2.3213715178  | -0.3644793626 |
| SE | -0.8210002753 | 3.2208047138  | 0.3665952053  |
| C  | 2.8837373941  | 2.8145763878  | 1.4668536208  |
| H  | 2.0211992735  | 3.2312277813  | 1.9811951837  |
| H  | 3.2786723343  | 1.9422448515  | 1.9818300319  |
| H  | 3.6601799630  | 3.5719525282  | 1.3679027653  |
| C  | -0.9968889093 | 3.9040391848  | -1.4647742258 |
| H  | -0.0440073715 | 3.8105973034  | -1.9800468449 |
| H  | -1.7886357682 | 3.3645217813  | -1.9787294765 |
| H  | -1.2654110868 | 4.9549402340  | -1.3659628671 |
| C  | -3.8786094228 | 1.0915922999  | 1.4652556519  |
| H  | -3.8087064989 | 0.1364890350  | 1.9801522958  |
| H  | -3.3198443830 | 1.8696102548  | 1.9796196850  |
| H  | -4.9225676370 | 1.3859489983  | 1.3664458606  |
| C  | -2.8837243122 | -2.8145833752 | -1.4669245735 |
| H  | -3.2786691464 | -1.9422453253 | -1.9818831384 |
| H  | -2.0211810935 | -3.2312145019 | -1.9812744044 |
| H  | -3.6601601009 | -3.5719693856 | -1.3679917509 |
| C  | 0.9968497687  | -3.9040763923 | 1.4647755831  |
| H  | 1.7886151117  | -3.3645796805 | 1.9787242714  |
| H  | 0.0439759489  | -3.8106190987 | 1.9800603245  |
| H  | 1.2653471947  | -4.9549826224 | 1.3659490439  |

|   |              |               |               |
|---|--------------|---------------|---------------|
| C | 3.8786557698 | -1.0915363374 | -1.4651863905 |
| H | 3.3199210033 | -1.8695571666 | -1.9795786702 |
| H | 3.8087507918 | -0.1364258727 | -1.9800691977 |
| H | 4.9226162495 | -1.3858737447 | -1.3663443393 |

18

c6seme6 dication singlet, -14876.0479687800 H

|    |            |            |            |
|----|------------|------------|------------|
| C  | -0.9968182 | -0.9729047 | -0.0081669 |
| C  | 0.3443517  | -1.3497524 | 0.0071455  |
| C  | 1.3412517  | -0.3766523 | -0.0077772 |
| C  | 0.9969425  | 0.9732312  | 0.0084316  |
| C  | -0.3442244 | 1.3500789  | -0.0073775 |
| C  | -1.3411256 | 0.3769816  | 0.0077456  |
| Se | -3.1961844 | 0.8982200  | -0.0313541 |
| Se | -2.3756289 | -2.3188412 | 0.0310734  |
| Se | 0.8206012  | -3.2168628 | -0.0325336 |
| Se | 3.1963077  | -0.8979166 | 0.0311754  |
| Se | 2.3757793  | 2.3191810  | -0.0295709 |
| Se | -0.8204965 | 3.2172083  | 0.0312113  |
| C  | 2.6724504  | 2.6094658  | 1.8980502  |
| H  | 1.7566974  | 2.9708589  | 2.3560554  |
| H  | 3.0192665  | 1.6875310  | 2.3549417  |
| H  | 3.4475711  | 3.3720493  | 1.9455507  |
| C  | -0.9258370 | 3.6200912  | -1.8960983 |
| H  | 0.0498758  | 3.4774621  | -2.3505636 |
| H  | -1.6845444 | 2.9949528  | -2.3570254 |
| H  | -1.2172711 | 4.6677307  | -1.9425643 |
| C  | -3.5965956 | 1.0150464  | 1.8957932  |
| H  | -3.4836303 | 0.0353064  | 2.3499325  |
| H  | -2.9491003 | 1.7543885  | 2.3573157  |
| H  | -4.6349823 | 1.3379521  | 1.9418990  |
| C  | -2.6732563 | -2.6098694 | -1.8962857 |
| H  | -3.0203022 | -1.6881113 | -2.3533603 |
| H  | -1.7577310 | -2.9714369 | -2.3546093 |
| H  | -3.4483986 | -3.3724733 | -1.9431026 |
| C  | 0.9264310  | -3.6207162 | 1.8945442  |
| H  | 1.6852600  | -2.9958128 | 2.3555895  |
| H  | -0.0491642 | -3.4783079 | 2.3493319  |
| H  | 1.2178707  | -4.6683802 | 1.9404109  |
| C  | 3.5966827  | -1.0143479 | -1.8960040 |
| H  | 2.9491712  | -1.7535869 | -2.3576685 |
| H  | 3.4837152  | -0.0345114 | -2.3499329 |
| H  | 4.6350653  | -1.3372522 | -1.9422027 |

18

c6teh6 neutral, -1840.1688690870 H

|    |               |               |               |
|----|---------------|---------------|---------------|
| C  | -0.8408040626 | -1.1304424879 | -0.0174462013 |
| C  | 0.5581891424  | -1.2935513997 | 0.0180935014  |
| C  | 1.3989774038  | -0.1635752123 | -0.0179601013 |
| C  | 0.8407793659  | 1.1295768862  | 0.0169621013  |
| C  | -0.5582271426 | 1.2926893964  | -0.0175523013 |
| C  | -1.3990107049 | 0.1627030123  | 0.0179075013  |
| Te | -3.4748225633 | 0.4038108307  | 0.5860301417  |
| H  | -4.1074319077 | 0.4848960366  | -0.9503697727 |
| Te | -2.0874566577 | -2.8071562104 | -0.5871324444 |
| H  | -2.4723503850 | -3.3178188487 | 0.9485290720  |

|    |               |               |               |
|----|---------------|---------------|---------------|
| Te | 1.3861102050  | -3.2117386440 | 0.5883942464  |
| H  | 1.6398265228  | -3.7991516846 | -0.9471188728 |
| Te | 3.4744314642  | -0.4066431307 | -0.5865911437 |
| H  | 4.1088537117  | -0.4765974361 | 0.9496107738  |
| Te | 2.0889975584  | 2.8063724089  | 0.5827003415  |
| H  | 2.4663434877  | 3.3180206505  | -0.9544876713 |
| Te | -1.3873626035 | 3.2115827430  | -0.5834013426 |

18

c6teh6 dication singlet, -1839.6268720200 H

|    |            |            |            |
|----|------------|------------|------------|
| C  | -0.8336975 | -1.1203322 | 0.0031917  |
| C  | 0.5533921  | -1.2821817 | -0.0029902 |
| C  | 1.3871207  | -0.1618331 | 0.0029149  |
| C  | 0.8337003  | 1.1203319  | -0.0031911 |
| C  | -0.5533897 | 1.2821804  | 0.0029865  |
| C  | -1.3871171 | 0.1618319  | -0.0029117 |
| Te | -3.5124360 | 0.4096013  | 0.0963271  |
| H  | -3.6898022 | 0.4311988  | -1.5607328 |
| Te | -2.1110207 | -2.8369059 | -0.0963197 |
| H  | -2.2184670 | -2.9800002 | 1.5606506  |
| Te | 1.4012343  | -3.2467126 | 0.0963137  |
| H  | 1.4713160  | -3.4110932 | -1.5606984 |
| Te | 3.5124393  | -0.4096027 | -0.0963084 |
| H  | 3.6897949  | -0.4312011 | 1.5607519  |
| Te | 2.1110198  | 2.8369068  | 0.0963257  |
| H  | 2.2184695  | 2.9800016  | -1.5606433 |
| Te | -1.4012352 | 3.2467086  | -0.0963385 |
| H  | -1.4713217 | 3.4111013  | 1.5606719  |

36

c6teme6 neutral, -2076.0002880650 H

|    |               |               |               |
|----|---------------|---------------|---------------|
| C  | -0.0010862001 | 1.4086513037  | 0.0183841014  |
| C  | -1.2204746940 | 0.7034436509  | -0.0167987013 |
| C  | -1.2194294896 | -0.7052742550 | 0.0164316012  |
| C  | 0.0010638001  | -1.4086601039 | -0.0181233014 |
| C  | 1.2204779908  | -0.7034234522 | 0.0166228013  |
| C  | 1.2193975908  | 0.7052983537  | -0.0165001013 |
| Te | 3.0334272265  | 1.7548642326  | -0.5445442436 |
| Te | -0.0030123002 | 3.5039927659  | 0.5479587439  |
| Te | -3.0360289264 | 1.7501123320  | -0.5453400415 |
| Te | -3.0338878277 | -1.7543882324 | 0.5438985415  |
| Te | 0.0027589002  | -3.5044897639 | -0.5457642405 |
| Te | 3.0366583298  | -1.7496901332 | 0.5438086396  |
| C  | 0.0019515001  | -4.3977999308 | 1.4185233063  |
| H  | 0.9021902692  | -4.0917664090 | 1.9450217484  |
| H  | -0.8992459693 | -4.0926001066 | 1.9438583470  |
| H  | 0.0025637002  | -5.4761167240 | 1.2646656934  |
| C  | 3.8105890888  | -2.1982965631 | -1.4199998061 |
| H  | 3.0956194335  | -2.8259365151 | -1.9455166456 |
| H  | 3.9968161036  | -1.2661163958 | -1.9468437480 |
| H  | 4.7441647600  | -2.7376775078 | -1.2651463980 |
| C  | 3.8107185891  | 2.1999509670  | 1.4187352048  |
| H  | 3.0964895332  | 2.8262795120  | 1.9468299471  |
| H  | 3.9982323036  | 1.2667705964  | 1.9433406476  |
| H  | 4.7438076554  | 2.7400178048  | 1.2633126930  |
| C  | -0.0016392001 | 4.3997190291  | -1.4152341046 |

|   |               |               |               |
|---|---------------|---------------|---------------|
| H | 0.8997251658  | 4.0951666110  | -1.9406644448 |
| H | -0.9017190686 | 4.0943107091  | -1.9423736449 |
| H | -0.0023175002 | 5.4778677186  | -1.2601473928 |
| C | -3.8124362878 | 2.1977795675  | 1.4177075055  |
| H | -3.9993128994 | 1.2653301971  | 1.9438475465  |
| H | -3.0981310357 | 2.8251675148  | 1.9444311443  |
| H | -4.7458248579 | 2.7372486044  | 1.2620026935  |
| C | -3.8091634853 | -2.2014070670 | -1.4197378051 |
| H | -3.9962660027 | -1.2687584931 | -1.9454348454 |
| H | -3.0943306329 | -2.8281539107 | -1.9465151448 |
| H | -4.7423457556 | -2.7414160075 | -1.2646963962 |

36

c6teme6 dication singlet, -2075.4976129350 H

|    |            |            |            |
|----|------------|------------|------------|
| C  | -0.0018391 | 1.3977864  | -0.0041520 |
| C  | -1.2114446 | 0.6973296  | 0.0041923  |
| C  | -1.2096044 | -0.7004808 | -0.0041665 |
| C  | 0.0018361  | -1.3977591 | 0.0041310  |
| C  | 1.2114416  | -0.6973023 | -0.0041802 |
| C  | 1.2096014  | 0.7005082  | 0.0041748  |
| Te | 3.0583393  | 1.7699477  | -0.0606827 |
| Te | -0.0038180 | 3.5334712  | 0.0606323  |
| Te | -3.0622250 | 1.7632349  | -0.0605566 |
| Te | -3.0583394 | -1.7699226 | 0.0607348  |
| Te | 0.0038153  | -3.5334406 | -0.0607604 |
| Te | 3.0622188  | -1.7632092 | 0.0606326  |
| C  | 0.0055787  | -3.9250825 | 2.0648172  |
| H  | 0.9214139  | -3.5380460 | 2.5005771  |
| H  | -0.8761782 | -3.4774758 | 2.5127496  |
| H  | -0.0306791 | -5.0088711 | 2.1577492  |
| C  | 3.4029861  | -1.9573241 | -2.0649259 |
| H  | 2.5747818  | -2.4973332 | -2.5131394 |
| H  | 3.5256012  | -0.9705913 | -2.5004985 |
| H  | 4.3236514  | -2.5303550 | -2.1574258 |
| C  | 3.3971223  | 1.9675739  | 2.0648548  |
| H  | 2.6042293  | 2.5673785  | 2.5006336  |
| H  | 3.4502732  | 0.9801750  | 2.5128277  |
| H  | 4.3539787  | 2.4778841  | 2.1573461  |
| C  | -0.0055843 | 3.9250116  | -2.0649640 |
| H  | 0.8761720  | 3.4773835  | -2.5128763 |
| H  | -0.9214202 | 3.5379544  | -2.5007041 |
| H  | 0.0306735  | 5.0087958  | -2.1579480 |
| C  | -3.4029280 | 1.9573396  | 2.0650131  |
| H  | -3.5255289 | 0.9706048  | 2.5005851  |
| H  | -2.5747106 | 2.4973476  | 2.5132038  |
| H  | -4.3235912 | 2.5303691  | 2.1575437  |
| C  | -3.3971716 | -1.9675468 | -2.0647951 |
| H  | -3.4503340 | -0.9801474 | -2.5127654 |
| H  | -2.6042881 | -2.5673500 | -2.5005932 |
| H  | -4.3540295 | -2.4778580 | -2.1572646 |

24

c6sbh2 neutral, -1677.0805236280 H

|   |               |               |              |
|---|---------------|---------------|--------------|
| C | -0.6295621461 | -1.2463629923 | 0.0180266014 |
| C | 0.7786439608  | -1.1730801879 | 0.0371013028 |
| C | 1.4188662079  | 0.0809969063  | 0.0447724034 |

|    |               |               |               |
|----|---------------|---------------|---------------|
| C  | 0.6295758465  | 1.2463929913  | -0.0180695014 |
| C  | -0.7786348589 | 1.1731071866  | -0.0371971028 |
| C  | -1.4188622073 | -0.0809722059 | -0.0448385034 |
| Sb | 1.4831686097  | 3.2300379425  | -0.5126621388 |
| H  | 2.1957102675  | 3.5883824715  | 1.0054704754  |
| H  | 2.9545447214  | 2.5722200915  | -1.1161206866 |
| Sb | 3.5415250644  | 0.3674182276  | 0.5900432421  |
| H  | 3.7331000821  | -1.2156467930 | 1.2218202912  |
| H  | 4.2291684193  | -0.1026977075 | -0.9122690690 |
| Sb | 1.7853928332  | -3.0942324335 | -0.3942023297 |
| H  | 3.1580496380  | -2.3862525799 | -1.1303882842 |
| H  | 2.6035950952  | -3.3239371484 | 1.0938462827  |
| Sb | -1.4830389137 | -3.2299661437 | 0.5128290387  |
| H  | -2.1962295650 | -3.5882809700 | -1.0050269772 |
| H  | -2.9541401231 | -2.5720117914 | 1.1168893854  |
| Sb | -3.5416228669 | -0.3676377276 | -0.5897071457 |
| H  | -3.7336863840 | 1.2155063917  | -1.2211369911 |
| H  | -4.2288875162 | 0.1020822077  | 0.9129046691  |
| Sb | -1.7853788364 | 3.0943848312  | 0.3933975295  |
| H  | -2.6030274944 | 3.3237225512  | -1.0949979841 |
| H  | -3.1582699398 | 2.3868267795  | 1.129515485   |

24

c6sbh2 dication singlet, -1676.4467260910 H

|    |            |            |            |
|----|------------|------------|------------|
| C  | -0.6258252 | -1.2607636 | 0.0568829  |
| C  | 0.7720214  | -1.1450675 | 0.0509723  |
| C  | 1.4090159  | 0.0933850  | -0.0286780 |
| C  | 0.6255652  | 1.2605093  | -0.0570989 |
| C  | -0.7722589 | 1.1447901  | -0.0512474 |
| C  | -1.4093529 | -0.0936235 | 0.0283093  |
| Sb | 1.4734336  | 3.2768186  | -0.1954757 |
| H  | 1.7407260  | 3.4706622  | 1.4789347  |
| H  | 3.0717522  | 2.6414085  | -0.5325126 |
| Sb | 3.5883739  | 0.2975050  | -0.0010028 |
| H  | 3.9015942  | -1.1667843 | 0.8526632  |
| H  | 3.8931516  | -0.3230446 | -1.5610325 |
| Sb | 1.8005586  | -3.0794786 | 0.1270204  |
| H  | 3.1395701  | -2.8459735 | -0.9025078 |
| H  | 2.6138633  | -3.0219280 | 1.6192328  |
| Sb | -1.4728384 | -3.2773733 | 0.1957602  |
| H  | -1.7438138 | -3.4707866 | -1.4780734 |
| H  | -3.0706320 | -2.6448511 | 0.5374881  |
| Sb | -3.5889154 | -0.2973890 | 0.0004156  |
| H  | -3.9010000 | 1.1665060  | -0.8542136 |
| H  | -3.8929390 | 0.3254703  | 1.5597215  |
| Sb | -1.7998647 | 3.0796179  | -0.1279072 |
| H  | -2.6135208 | 3.0221929  | -1.6198909 |
| H  | -3.1386651 | 2.8481978  | 0.9022401  |

## References

- 1 T. Helgaker, P. Jørgensen and J. Olsen, *Molecular electronic-structure theory*, Wiley, Chichester; New York, 2000.
- 2 H. B. Schlegel and M. J. Frisch, *Int. J. Quantum Chem.*, 1995, **54**, 83–87.
